# Supplementary material for: Identification and Characterization of SOG1 (Suppressor of Gamma Response 1) Homologues in Plants Using Data Mining Resources and Gene Expression Profiling
Source: MDPI journal article supplement (doi:10.3390/genes13040667), 2022-04-09
Supplement: s1 [file s1]

## **Supplementary Material**

### **Identification and Characterization of SOG1 (Suppressor of Gamma-Response 1)**

### **Homologues in Plants Using Data Mining Resources and Gene Expression Profiling**

Andrea Pagano<sup>1</sup>, Carla Gualtieri<sup>1,#</sup>, Giacomo Mutti<sup>1,§</sup>, Alessandro Raveane<sup>1,‡</sup>, Federico Sincinelli<sup>1</sup>, Ornella Semino<sup>1</sup>, Alma Balestrazzi<sup>1</sup>, Anca Macovei<sup>1,\*</sup>

<sup>1</sup> Department of Biology and Biotechnology ‘L. Spallanzani’, University of Pavia, via Ferrata 9, 27100 Pavia, Italy

Present addresses:

<sup>#</sup> Department of Agricultural, Forest and Food Sciences, University of Turin, via Verdi 8, 10124 Turin, Italy

<sup>§</sup> Department of Chemistry, Life Sciences and Environmental Sustainability, University of Parma, Parco Area delle Scienze 11/a, 43124, Parma, Italy

<sup>‡</sup> Human Technopole, Viale Rita Levi-Montalcini 1, 20157 Milan, Italy

\* Corresponding author: A. Macovei, e-mail: [anca.macovei@unipv.it](mailto:anca.macovei@unipv.it)

|                                |                                                                 |     |
|--------------------------------|-----------------------------------------------------------------|-----|
| A.thaliana_ATIG25580           | -----MAGRSWLIDSNRIATKIMSASASSDPQVWKSNPSSRCP                     | 40  |
| M.truncatula_Medtrig093680     | -----MAASPSPWLVDKKRIATKI KRAEAT- -EKVIWKSNPTRACP                | 40  |
| G.max_Glyma_10G204700          | -----MAGPSWLVDKSRIATKIKNVSGTC-- -GKVIWKSNPSSRCP                 | 38  |
| G.max_Glyma_20G185800          | MLKTILNLNLSHLIASFSDLPFMAGPSWLVDKSRIATKISASGTC-- -GKVIWKSNPSSRCP | 58  |
| M.truncatula_Medtrs5g053430    | -----MAGPSWLVDKSRIATKI KASAGACDPENVTWKSNPTKACP                  | 40  |
| G.max_Glyma_01G088200          | -----MAGTSWLVDKSRIATKI KCASGACDPKGVIWKSNPTKPCP                  | 40  |
| G.max_Glyma_02G100200          | -----MAGTSLWVDKSRIATKI KCASGACHDGKIVKSNPTKACP                   | 40  |
| K.fedschenkoi_Kaladp0073s0030  | -----MSTGPVLVDGHRIATKI KSAAGASDLGHMKWSNPPCRACP                  | 41  |
| K.fedschenkoi_Kaladp0062s0046  | -----MARPAWLVDSTRITAKI KSASTACPEPSINWNKSNPRICP                  | 40  |
| P.trichocarpa_Potri.008G116600 | -----MAGPWLVDGNRFATKI KSASASNHERVAWKSDDPKCTCP                   | 39  |
| P.trichocarpa_Potri.010G129700 | -----MAGPWLVDGNRFATKI KSASGASNERVEWKSDDPKCTCP                   | 39  |
|                                | ***. *.****. :. :. *:*.*: **                                    |     |
| A.thaliana_ATIG25580           | KCQHVIDNSDVVDWPGLPRGVKFDPSPDEI IWHLLAKSGLSGLSSHPIDEFIPTVNQD     | 100 |
| M.truncatula_Medtrig093680     | NCOHQVIDNSDVQTQEWPLPGVKGFDPSPDQE IWHLLAVKGEGNLEPHPFIDEFI STLQMD | 100 |
| G.max_Glyma_10G204700          | SCHHVINDNSDVQEWPLGPLPGVKFDPSPDQE IWHLLAVKVGAGSKPHPFIDEFI TSLVED | 100 |
| G.max_Glyma_20G185800          | SCHHVINDNSDVQEWPLGPLPGVKFDPSPDQE IWHLLAVKVGAGSKPHPFIDEFI TTLEVD | 118 |
| M.truncatula_Medtrs5g053430    | NCOHTINDNSDVVKWEPLPGVKGFDPSPDQEI IWHLLAKVGVGSKHFPFDFEPI ITLVEN  | 100 |
| G.max_Glyma_01G088200          | NCOHAINDNDVAQEWPLPGVKGFDPSPDQE IWHLLAVKVGVDGSKHFPFIDEFI TTLEVD  | 100 |
| G.max_Glyma_02G100200          | NCOHAINDNDVAQEWPLPGVKGFDPSPDQE IWHLLAVKVGDSKHFPFIDEFI TTLEVD    | 100 |
| K.fedschenkoi_Kaladp0073s0030  | NCOQYIINDSVDPDWPLPGRVKGFDPDQEI IHLLLACKGIGLNKAHPFINIEPI PTVNKE  | 101 |
| K.fedschenkoi_Kaladp0062s0046  | NCOQCIDINDSVQEWPLPGRVKGFDPDQEI IWHLLTKVDSNTLTHPFIDEFIATVDKD     | 100 |
| P.trichocarpa_Potri.008G116600 | NCHHVINDNSDVQEWPLPGVKGFDPSPDQE IWHLLAKAGNGGIKSHPFIKEPIPTVEND    | 99  |
| P.trichocarpa_Potri.010G129700 | NCHHVINDNSDVQEWPLPGRVKGFDPSPDQE IWHLLAKVSDGGIKPHPFIKEPIPTVND    | 99  |
|                                | .**: ****. **: *****. *: *****. *: *****. *: *****. *: *        |     |
| A.thaliana_ATIG25580           | DGICYTHPNKLPGVKSDBGTSVSHFFHKAIKAYSTGTRKRKRILHDDFGDVRWHKTGRTPKV  | 160 |
| M.truncatula_Medtrig093680     | DGICYTHPKRLPGVSQDGIASHVFHRAIKAYNTGSRKRRI CGQDFGDVRWHKTGRTPKV    | 160 |
| G.max_Glyma_10G204700          | DGICYTHPQHLPGVKQDGSALHFHRAIKAYNTGSRKRRI CGQDFGDVRWHKTGRTPKV     | 158 |
| G.max_Glyma_20G185800          | DGICYTHPQHLPGVKQDGSSSHVFHRAIKAYNTGSRKRRI CGQDFGDVRWHKTGRTPKV    | 178 |
| M.truncatula_Medtrs5g053430    | DGICYTHPONLPGVKQDGSASHVFHRAIKAYNTGTRKRKRILHQDFGDVRWHKTGRTPKV    | 160 |
| G.max_Glyma_01G088200          | DGICYTHPONLPGVKQDGSASHVFHRAIKAYNTGTRKRKRILHQDFGDVRWHKTGRTPKV    | 160 |
| G.max_Glyma_02G100200          | DGICYTHPONLPGVKQDGSASHVFHRAIKAYNTGTRKRKRILHQDFGDVRWHKTGRTPKV    | 160 |
| K.fedschenkoi_Kaladp0073s0030  | DGICYTHPONLPGVKLDGSVAHFHRAIKAYNTGSRKRRI QGDSGSDVRWHKTGRTPKV     | 161 |
| K.fedschenkoi_Kaladp0062s0046  | DGICYTHPONLPGVKQDGSISHVFHRAIKAYNTGSRKRRIHQDSDASDVRWHKTGRTPKV    | 160 |
| P.trichocarpa_Potri.008G116600 | DGICYTHPNKLPGVKQDGSISHVFHRAIKAYNTGTRKRRI HQDSDGSDVRWHKTGRTPKV   | 159 |
| P.trichocarpa_Potri.010G129700 | DGICYTHPONLPGVKQDGSISHVFHRAIKAYNTGTRKRRI HQDSDGSDVRWHKTGRTPKV   | 159 |
|                                | *****. ****. *: *****. *: *****. *: *****. *: *****. *: *       |     |
| A.thaliana_ATIG25580           | VLDGVQRGCKKIMVLV---- -GGKAVKTNVMWMQHYHLGIEDEKEGDVVSVSKI FYQQOQQ | 215 |
| M.truncatula_Medtrig093680     | LNLNGQKGCCKIMVLVLYMTLESGGKAEKTNVMWMQHYHLGRQEDKEGDGEYVISKVFYQQOQ | 219 |
| G.max_Glyma_10G204700          | LNLNGQKGCCKIMVLVISPVRGGKPEKTNVMWMQHYHLGTEDEKDGGEYVISKVFYQQOQ    | 217 |
| G.max_Glyma_20G185800          | LNLNGQKGCCKIMVLVISPVRGGKSEKTNVMWMQHYHLGTEDEKDGGEYVISKVFYQQOQ    | 237 |
| M.truncatula_Medtrs5g053430    | LNLNGQKGCCKIMVLVISSVAGGKAEKTNVMWMQHYHLGTEDEKDGGEYVISKVFYQQOQ    | 219 |
| G.max_Glyma_01G088200          | VFNIGQKGCCKIMVLVYSNVRGGKAEKTNVMWMQHYHLGTEDEKDGGEYISKVFYQQOQ     | 219 |
| G.max_Glyma_02G100200          | LVLSGVQKGCCKIMVLVYSNVRGGKAEKTNVMWMQHYHLGTEDEKDGGEYISKVFYQQOQ    | 219 |
| K.fedschenkoi_Kaladp0073s0030  | MLDGVQRGCKKIMVLVISPVRGGKAEKTNVMWMQHYHLGTEDEKDGGEYISKVFYQQOQ     | 220 |
| K.fedschenkoi_Kaladp0062s0046  | VLDGVQRGCKKIMVLVYMTAAGKAEKTNVMWMQHYHLGTEDEKDGGEYISKVFYQQOQ      | 219 |
| P.trichocarpa_Potri.008G116600 | ILDGVQRGCKKIMVLVYSTVRGGKAEKTNVMWMQHYHLGTEDEBERDGEYVSVKYFYQQOQ   | 218 |
| P.trichocarpa_Potri.010G129700 | ILDGTQKGCCKIMVLVYMTVRGGKAEKTNVMWMQHYHLGTEDEBERDGEYVSVKIFYQQOQ   | 217 |
|                                | :. *: *****. **: *****. *: *****. *: *****. *: *****. *: *      |     |
| A.thaliana_ATIG25580           | LUVKRGDKAQEVESDIF-----AAVTPTADPVTPKLATPEPRNAVIRICSOSH           | 263 |
| M.truncatula_Medtrig093680     | -AKLGKDDQNVPETT-----EATTVKVDPVTPKSVTPPEPRNEKHSVDV               | 264 |
| G.max_Glyma_10G204700          | -VKFGEKDDQDI PETT-----EATTVKVDPVTPKSVTPPEPRIENRWSLD             | 262 |
| G.max_Glyma_20G185800          | -VKFGEKDDQDI PEIT-----EATTVKVDPATPKSVTPPEPRI EKRCNSLD           | 282 |
| M.truncatula_Medtrs5g053430    | -VKLGDKDDQDI PEAII-----EATI AKVDPVTPKSVTPPEPPYTERLYSDV          | 264 |
| G.max_Glyma_01G088200          | -VKLGDKDDKDVPEATE IN-----ESTI VKVDPVTPKFVTPETPCNRERWABD         | 267 |
| G.max_Glyma_02G100200          | -VKLGDKNDQDVPEASII TGPHGLSGVGEETI EKVDPVTPKLVTPPEPCNGRWABD      | 277 |
| K.fedschenkoi_Kaladp0073s0030  | -KGASDVGQETISETS-----NTAVAKVDVPTRSAPI PVPPRTEARDSL              | 265 |
| K.fedschenkoi_Kaladp0062s0046  | -AKLGENTFEALMEIS-----DLAAQKVDPLTPKSVSPPEPRDERPYAELG             | 264 |
| P.trichocarpa_Potri.008G116600 | -ANKGENTEEDLSIEIA-----NAVAKVDPVTPKSVTPDPPRAERCCQDFD             | 263 |
| P.trichocarpa_Potri.010G129700 | -ANKGEPPEEDLSIEIV-----DDVAKVDPVTPKSVTPDPPRAERCCQDFD             | 262 |
|                                | :. :. :. :. * *****. *: *****. *                                |     |
| A.thaliana_ATIG25580           | IASDYVTPSDVYSAHEVLSLAETSSEVMCMEDEVQSIPQ-----NHERPSSGMPELE       | 312 |
| M.truncatula_Medtrig093680     | QEQESHHSQP-----I-LPNLSRLEWLLESQDDCELAKTDSMSIETQTNVGDNFPLS       | 317 |
| G.max_Glyma_10G204700          | LQGESHHI PQ-----H-PQTDCELDDQADCEDLAKDDLIVETENNENGI-----         | 305 |
| G.max_Glyma_20G185800          | LQGESHHI PQ-----H-PQTDYLDDLQAVCEDLAKDDLIVETQNNENAI-----         | 325 |
| M.truncatula_Medtrs5g053430    | LGGDTPTAI PQ-----P-PQMNCLEDI QPYCEEQAQK                         |     |

|                                |                      |                                                  |              |
|--------------------------------|----------------------|--------------------------------------------------|--------------|
| G.max_Glyma.10G204700          | LQSQSPKRDGEN---      | EHKKRSSLVYANLGPHEHLKDDIVECQNLVLDTANV-----        | 390          |
| G.max_Glyma.20G185800          | LQSQSPKRDDEEN---     | EKKKRPSLSVYADLGPHEHLKDDIECQNLVLDPANV-----        | 410          |
| M.truncatula_Medtrig093630     | LRQSPSTRDGKDE---     | EQHQKPSLSIYAQGLGPHEHLKDDIECQNLVLEPSNVES-----     | 412          |
| G.max_Glyma.01G088200          | LQSQSPSRDGKHE---     | DHKNQPLGLSVYAQGLPENLKDDIECQNIALDKAN-----         | 394          |
| G.max_Glyma.02G100200          | LQSQSPSRDGKHE---     | DHKNQPLGLSVYAQGLGPHEHLKDDIECQNIALNPAN-----       | 404          |
| K.fedtschenkoi_Kaladp0073s0030 | LQSQSPGRQGFA--       | NQOESKGRPLRADYSRLGPENLKKDLEECQTLEFDPPTKIELD-ALLE | 411          |
| K.fedtschenkoi_Kaladp0062s0046 | LRQSPSRDFAVPEPHKPAK  | PCLSDYATLGPNDLKRDLLECQKLVLDPANIETD-T--           | 407          |
| P.trichocarpa_Potri.008G116600 | LQSQSPSRGGHGT--      | GASGKSLSDGYARLGPHEHLKKDLEECQNLBPDANIETD-T--      | 401          |
| P.trichocarpa_Potri.010G129700 | LQSQSPDRGGHGT--      | EANGKTLGSDYALLGPYLLKKDLEECQNLBPDANIETD-T--       | 401          |
|                                | : ** .               | : : : * : * : : * : * : : : : :                  |              |
|                                |                      |                                                  |              |
| A.thaliana_AT1G25580           | -----                | TPPEFRLSQLEFGSQDSFL-----                         | AWGTGK 447   |
| M.truncatula_Medtrig093680     | LDVETEKNLNLDTANVELDS | QSPSDIRLSQLEFSSQDSYI-----                        | AWGCKK 478   |
| G.max_Glyma.10G204700          | -----                | VPETPPSEFQLSQLDFFSSQDSFV-----                    | SWCASK 419   |
| G.max_Glyma.20G185800          | -----                | VPETPPSEFRLSQLDFFSSQDSFV-----                    | SWCANK 439   |
| M.truncatula_Medtrig093630     | -----                | NVENTDTPSEFRLSQLEFGSQDSFI-----                   | AFGYNK 442   |
| G.max_Glyma.01G088200          | -----                | INENTDTPSEFRLSQLEFSCFIGIWFNTQQLYFLGLWQGSSELWFFTS | 438          |
| G.max_Glyma.02G100200          | -----                | INENTDTPSEFQLSQLEFGSQDSFI-----                   | FISWGYSK 433 |
| K.fedtschenkoi_Kaladp0073s0030 | LH-----              | LSQDIRLSQDFFRLSQLEFGSQDSFC-----                  | AFPGNK 444   |
| K.fedtschenkoi_Kaladp0062s0046 | -----                | PDYRRLSQLEFGSQDSFL-----                          | AWGGHK 431   |
| P.trichocarpa_Potri.008G116600 | -----                | PEPEFRLSQLEFGSQDSFM-----                         | AWGEGR 425   |
| P.trichocarpa_Potri.010G129700 | -----                | PEPEFRLSQLEFLPHCFI-----                          | LSSV*- 423   |
|                                |                      | : : ****                                         |              |
|                                |                      |                                                  |              |
| A.thaliana_AT1G25580           | TDF*-----            |                                                  | 449          |
| M.truncatula_Medtrig093680     | TIN*-----            |                                                  | 481          |
| G.max_Glyma.10G204700          | AFD*-----            |                                                  | 422          |
| G.max_Glyma.20G185800          | AID*-----            |                                                  | 442          |
| M.truncatula_Medtrig093630     | VVK*-----            |                                                  | 445          |
| G.max_Glyma.01G088200          | AGQADVFTVTFCC*       |                                                  | 451          |
| G.max_Glyma.02G100200          | AVN*-----            |                                                  | 436          |
| K.fedtschenkoi_Kaladp0073s0030 | VID*-----            |                                                  | 447          |
| K.fedtschenkoi_Kaladp0062s0046 | LGD*-----            |                                                  | 434          |
| P.trichocarpa_Potri.008G116600 | VAD*-----            |                                                  | 428          |
| P.trichocarpa_Potri.010G129700 |                      |                                                  | 423          |
